# Supplementary material for: A new rhodamine derivative as a single optical probe for the recognition of Cu2+and Zn2+ions
Source: Royal Society of Chemistry journal article supplement (doi:10.1039/c4ra13332c), 2015-01-01
Supplement: c4ra13332c1.pdf [file c4ra13332c1.pdf]

## Supporting Information

*for*

# A new rhodamine derivative as single optical probe for the recognition of Cu<sup>2+</sup> and Zn<sup>2+</sup> ions.

Abhishek Rai<sup>a</sup>, Niraj Kumari<sup>a</sup>, Rohini Nair<sup>b</sup>, Kiran Singh<sup>b</sup> and Lallan Mishra<sup>a\*</sup>

<sup>a</sup>*Department of Chemistry, Faculty of Science, Banaras Hindu University, Varanasi, India.*

<sup>b</sup>*Molecular and Human Genetics, Banaras Hindu University, Varanasi, India,*

\*E mail: [lmishrabhu@yahoo.co.in](mailto:lmishrabhu@yahoo.co.in); Fax: +91-542-2368127

---

### Contents List

|                                                                                                                                                                                                                                   |         |
|-----------------------------------------------------------------------------------------------------------------------------------------------------------------------------------------------------------------------------------|---------|
| <sup>1</sup> H NMR of <b>RHDN</b>                                                                                                                                                                                                 | .....S1 |
| <sup>13</sup> C NMR of <b>RHDN</b> .                                                                                                                                                                                              | .....S2 |
| ESI-MS spectrum of <b>RHDN</b> .                                                                                                                                                                                                  | .....S3 |
| Colorimetric response of <b>RHDN</b> in CH <sub>3</sub> CN/aqueous HEPES buffer<br>(1 mM, pH 7.2; 7:3v/v) in the presence of Zn <sup>2+</sup> (20 eq.) solution                                                                   | .....S4 |
| Job's plot analysis from (a) absorption spectra showing maximum absorption<br>at 1:1 ratio [ <b>RHDN</b> : Cu <sup>2+</sup> ]; (b) emission intensity showing maximum emission<br>at 1:1 ratio [ <b>RHDN</b> : Zn <sup>2+</sup> ] | .....S5 |
| ESI-MS of (a) <b>RHDN</b> -Cu <sup>2+</sup> (b) <b>RHDN</b> -Zn <sup>2+</sup> ions in acetonitrile                                                                                                                                | .....S6 |
| <sup>1</sup> H NMR spectra for <b>RHDN</b> in presence of Zn <sup>2+</sup> ions recorded in DMSO-d <sub>6</sub>                                                                                                                   | .....S7 |
| <sup>13</sup> C NMR spectra of <b>RHDN</b> in the presence of Zn <sup>2+</sup> ions recorded in DMSO-d <sub>6</sub> .                                                                                                             | .....S8 |

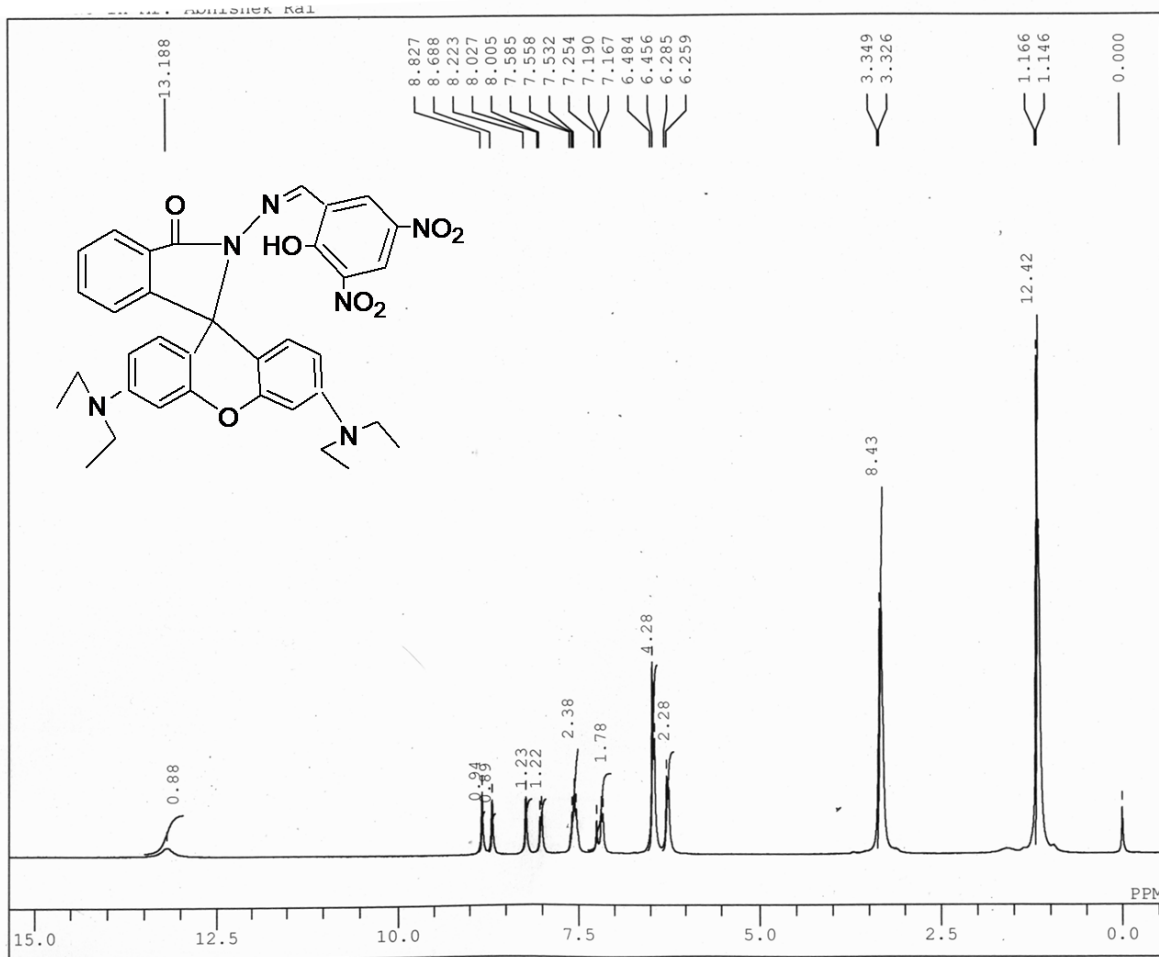

Fig. S1:  $^1\text{H}$  NMR of **RHDN** recorded in  $\text{DMSO-d}_6$

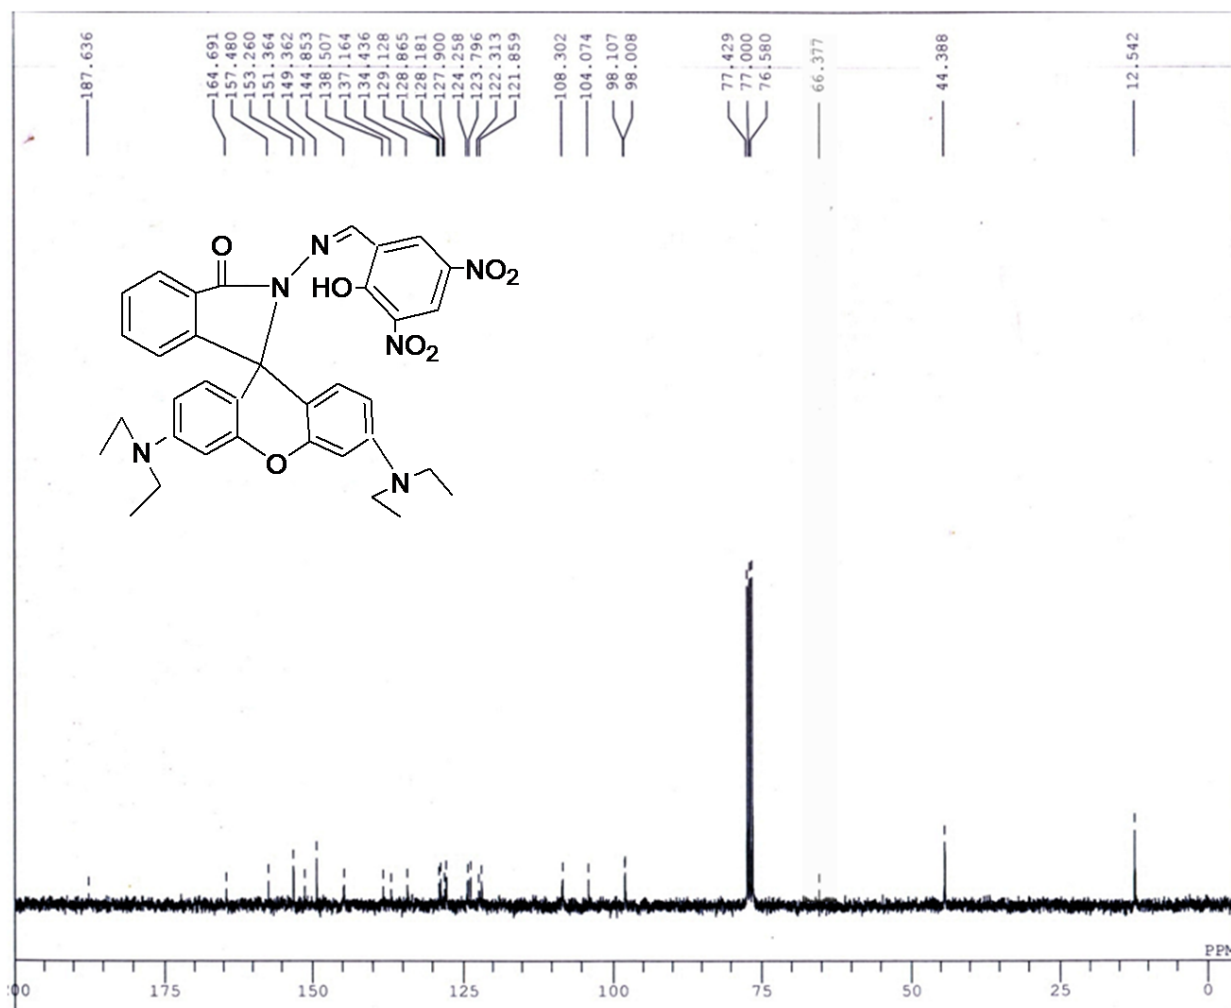

Fig. S2: <sup>13</sup>C-NMR spectrum of **RHDN** recorded in DMSO-d<sub>6</sub>

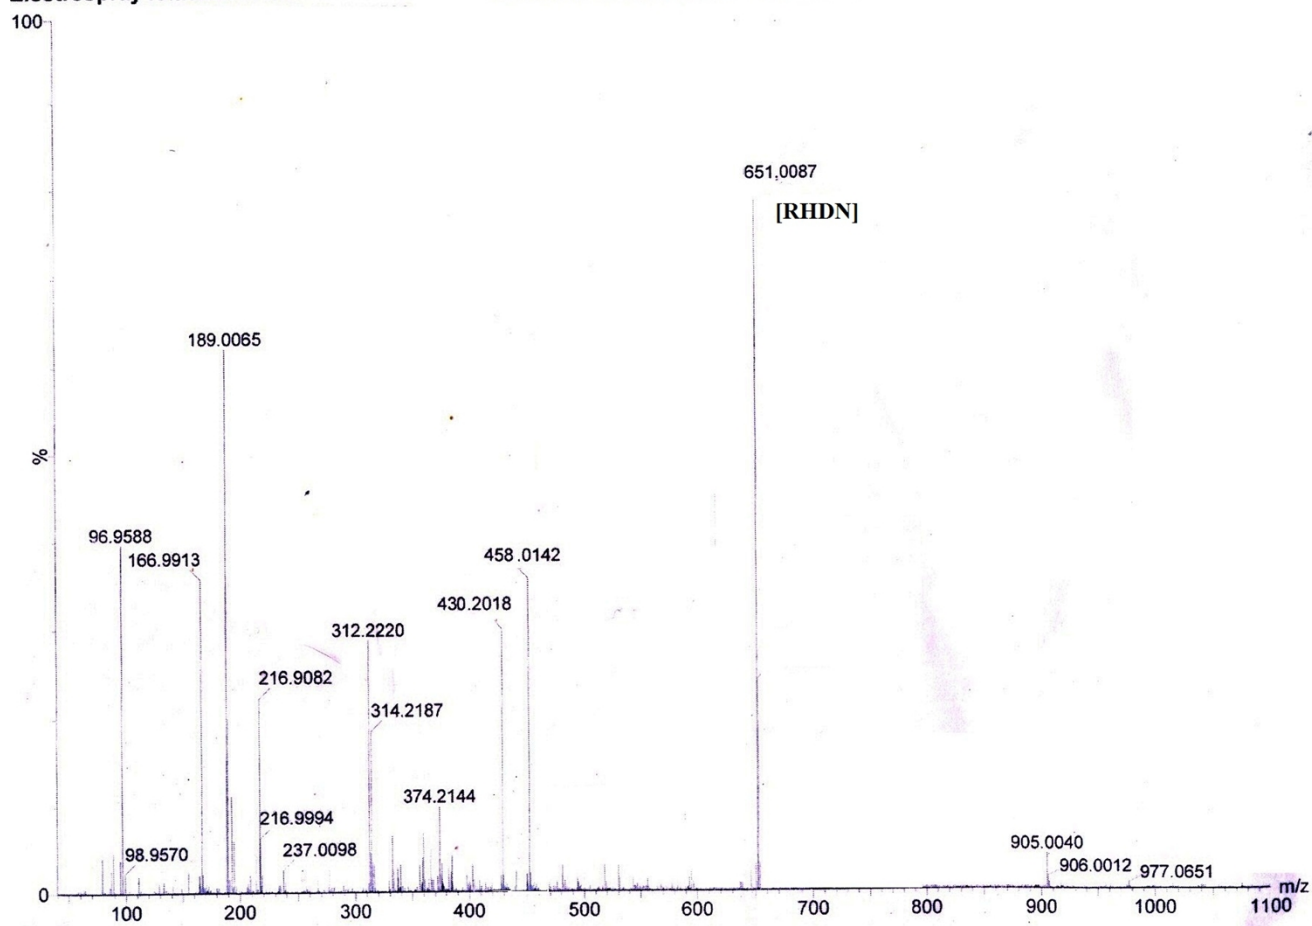

Fig. S3: ESI-MS spectrum of **RHDN**.

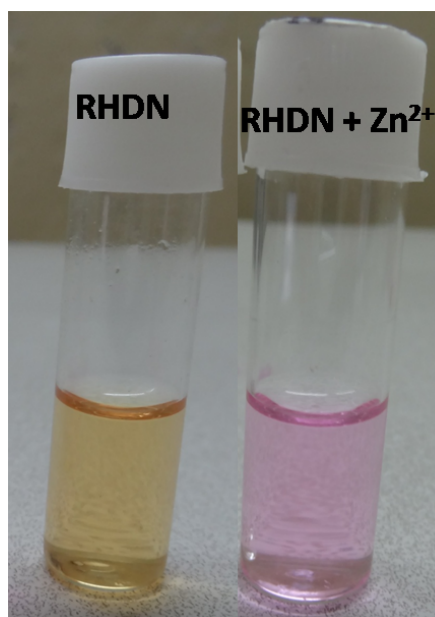

Fig. S4: Colorimetric response of **RHDN** in CH<sub>3</sub>CN/aqueous HEPES buffer (1 mM, pH 7.2; 7:3v/v) in the presence of Zn<sup>2+</sup> (20 eq.) solution

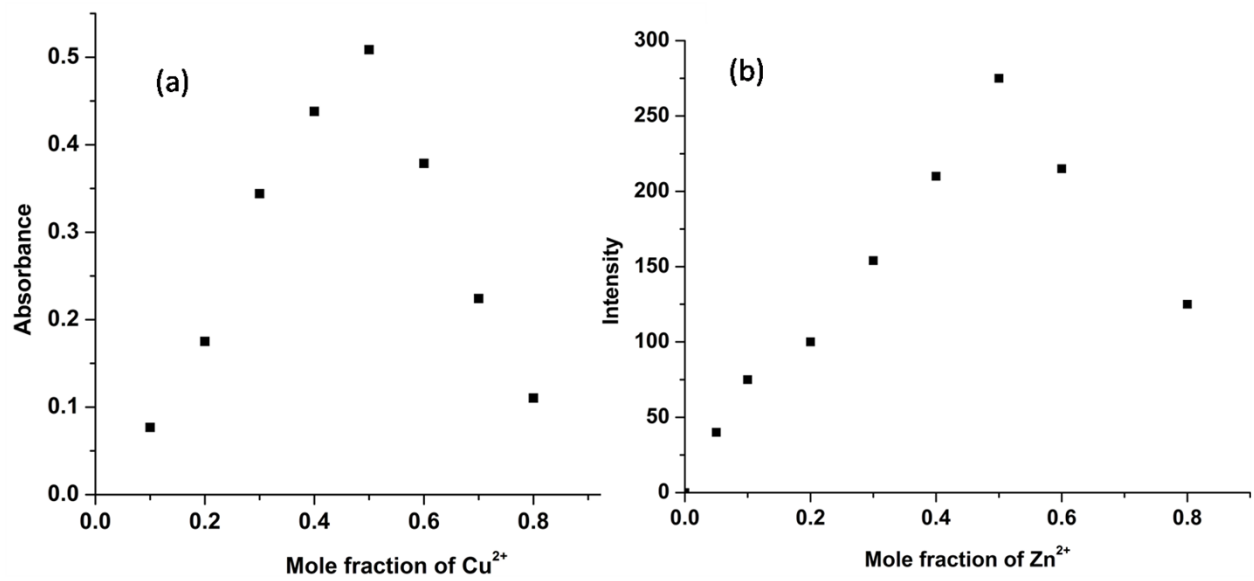

Fig. S5: Job's plot analysis from (a) absorption spectra showing maximum absorption at 1:1 ratio [RHDN:  $\text{Cu}^{2+}$ ]; (b) emission intensity showing maximum emission at 1:1 ratio [RHDN:  $\text{Zn}^{2+}$ ].

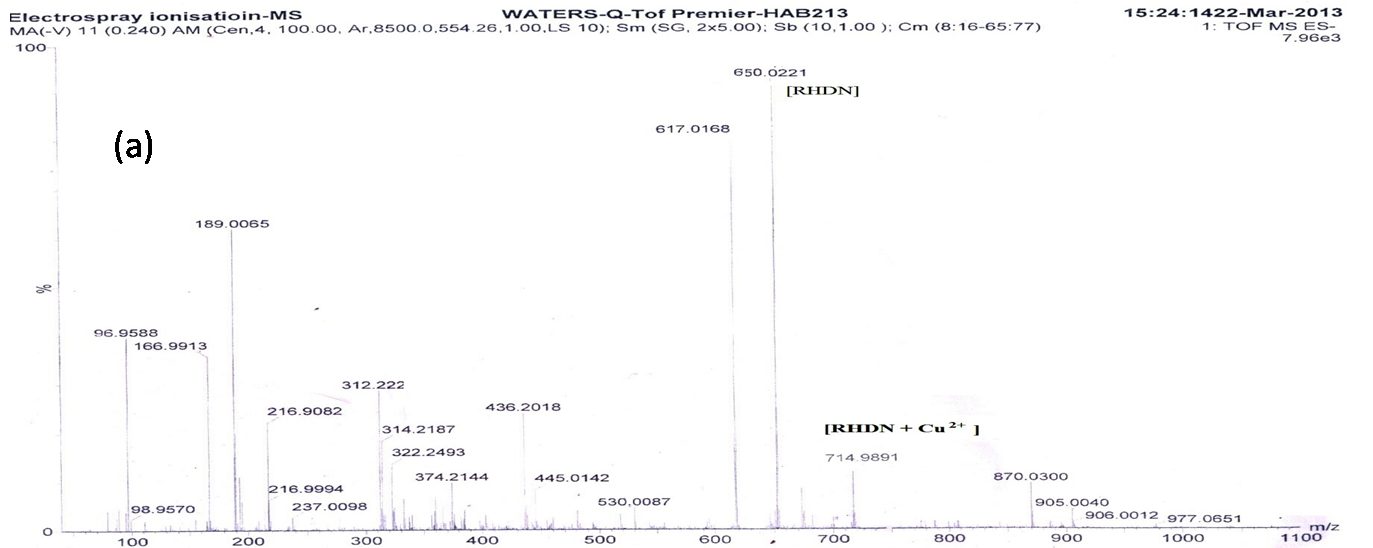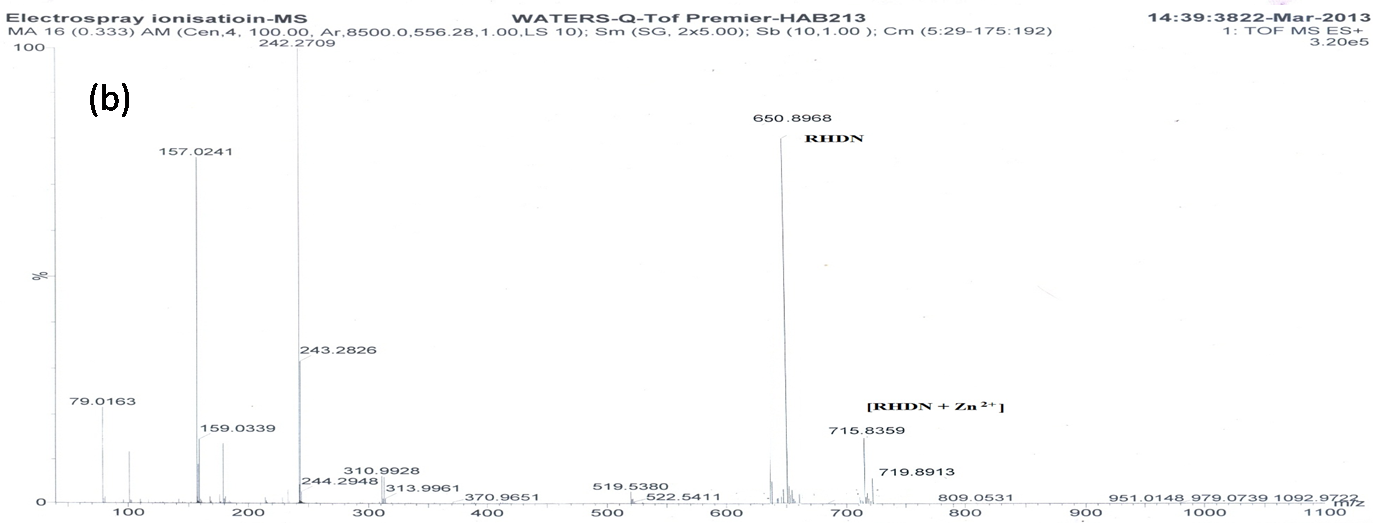

Fig. S6: ESI-MS of (a) **RHDN-Cu<sup>2+</sup>** adduct (b) **RHDN-Zn<sup>2+</sup>** adduct in acetonitrile.

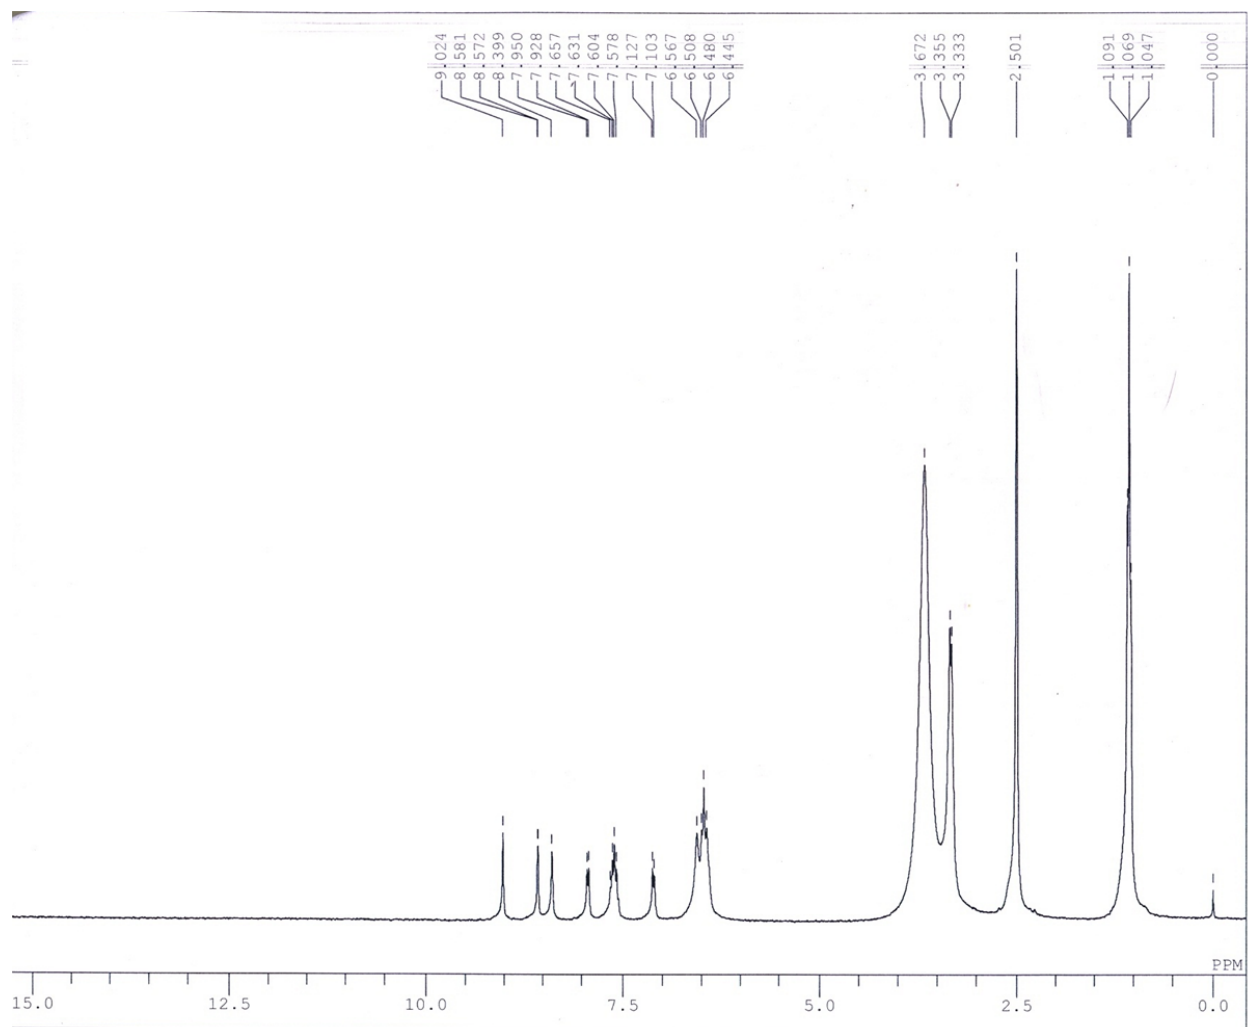

Fig. S7: <sup>1</sup>H NMR spectrum of **RHDN** recorded in DMSO-d<sub>6</sub> in the presence of Zn<sup>2+</sup> ions.



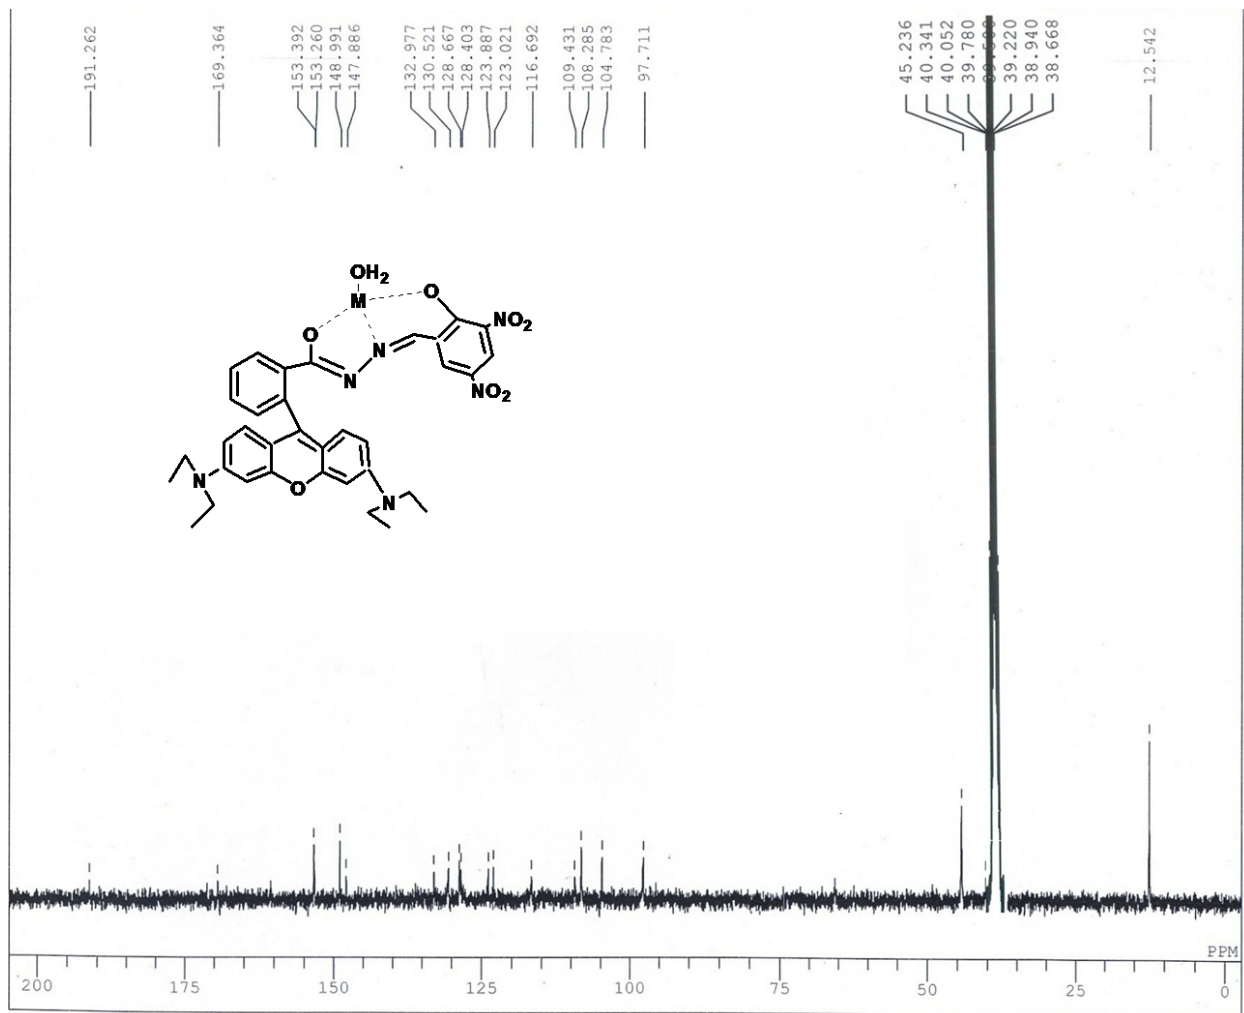

Fig. S8:  $^{13}\text{C}$  NMR spectrum of **RHDN** recorded in  $\text{DMSO-d}_6$  in the presence of  $\text{Zn}^{2+}$  ions.
